# Supplementary material
Source: Elsevier journal article supplement (https://www.sciencedirect.com/science/article/pii/S0014256513002415)
Supplement: mmc1 [file S0014256513002415:mmc1.docx]

La correcta es la 2) ya que es una enfermedad producida por déficit de ácido

Ascórbico1. El escorbuto se caracteriza por la aparición de petequias

perifoliculares, inflamación y sangrado gingival y hemorragias espontáneas
